1 Species composition and altitudinal distribution of bumble bees  
2 (Hymenoptera: Apidae: *Bombus*) in the East Himalaya, Arunachal  
3 Pradesh, India

4 Martin Streinzer<sup>1,#</sup>, Jharna Chakravorty<sup>2</sup>, Johann Neumayer<sup>3</sup>, Karsing Megu<sup>2,4</sup>, Jaya  
5 Narah<sup>2</sup>, Thomas Schmitt<sup>5</sup>, Himender Bharti<sup>6</sup>, Johannes Spaethe<sup>7,§</sup>, Axel Brockmann<sup>4,§</sup>

6  
7 <sup>1</sup> Department of Neurobiology, Faculty of Life Sciences, University of Vienna, Vienna, Austria

8 <sup>2</sup> Department of Zoology, Rajiv Gandhi University, Itanagar, Arunachal Pradesh, India

9 <sup>3</sup> Obergrubstrasse 18, 5161 Elixhausen, Austria

10 <sup>4</sup> National Centre for Biological Sciences, Tata Institute of Fundamental Research, Bengaluru, India

11 <sup>5</sup> Department of Animal Ecology and Tropical Biology (Zoology III), Biocenter, University of  
12 Würzburg, Würzburg, Germany

13 <sup>6</sup> Department of Zoology and Environmental Sciences, Punjabi University, Patiala, Punjab, India

14 <sup>7</sup> Department of Behavioral Physiology and Sociobiology (Zoology II), Biocenter, University of  
15 Würzburg, Würzburg, Germany

16 <sup>§</sup> Co-senior authors

17 <sup>#</sup> Corresponding author: martin.streinzer@univie.ac.at

18

19

20 **Abstract**

21 The East Himalaya is one of the world's most biodiverse ecosystems. Yet, very little is known  
22 about the abundance and distribution of many plant and animal taxa in this region. Bumble  
23 bees are a group of cold-adapted and high altitude insects that fulfill an important ecological  
24 and economical function as pollinators of wild and agricultural flowering plants and crops.  
25 The Himalayan mountain range provides ample suitable habitats for bumble bees. Himalayan  
26 bumble bees have been studied systematically for a few decades now, with the main focus on  
27 the western region, while the eastern part of the mountain range received little attention and  
28 only a few species are genuinely reported. During a three-year survey, we collected more than  
29 700 bumble bee specimens of 21 species in Arunachal Pradesh, the largest of the north-  
30 eastern states of India. We collected a range of species that were previously known from a  
31 very limited number of collected specimens, which highlights the unique character of the East  
32 Himalayan ecosystem. Our results are an important first step towards a future assessment of  
33 species distribution, threat and conservation. We observed clear altitudinal patterns of species  
34 diversity, which open important questions about the functional adaptations that allow bumble  
35 bees to thrive in this particularly moist region in the East Himalaya.

36

37 **Keywords**

38 Conservation, Apidae, pollination, alpine habitats, global change, insect collection

## 39 Introduction

40

41 Bumble bees (Hymenoptera: Apidae: *Bombus* LATREILLE) are a group of conspicuous, large  
42 and colorful bees that mainly inhabit cold and temperate habitats at high latitudes and  
43 altitudes. Their conspicuous appearance and abundance made them a prime study object of  
44 many early naturalists and insect collectors. After extensive revision in the past decades,  
45 around 260 species are currently recognized (Williams 1998; updated online at  
46 <http://www.nhm.ac.uk/research-curation/research/projects/bombus/index.html>).

47

48 Current global sampling efforts focus on revising the bumble bee taxonomy at the subgenus  
49 level and filling white spots in global distribution data for a worldwide IUCN red list  
50 assessment of all species ([iucn.org/bumblebees](http://iucn.org/bumblebees)). The latter is urgently needed, since a number  
51 of bumble bee species showed dramatic declines in their abundance and range in the recent  
52 past (Cameron et al. 2011). The reasons are only partially understood and most likely involve  
53 pathogen spillover from commercial breeding, and changes in agricultural practices and land  
54 use (Cameron et al. 2011, Jacobson et al. 2018). Moreover, climate change poses a threat to  
55 many bumble bee species worldwide, especially those adapted to high altitudes, due to an  
56 ongoing decline in suitable habitats (Hoiss et al. 2012, Kerr et al. 2015, Rasmont et al. 2015).

57

58 Bumble bees are pollinators of many wild flowers. They are abundant throughout the season  
59 and, due to their thermoregulatory abilities, able to be active at very low ambient temperatures  
60 (Corbet et al. 1993). Thus, they serve as important pollinators, especially in alpine  
61 environments and early in the flowering season (Kevan and Baker 1983, Yu et al. 2012).  
62 Besides their ecological importance, bumble bees serve as pollinators for many cultivated  
63 fruits, vegetables and spices, making them also economically important. In the industrialized  
64 western world, more than one million colonies per year are commercially reared and sold for  
65 pollination purposes (Velthuis and van Doorn 2006).

66

67 Bumble bees are cold-adapted and therefore are most diverse and abundant in northern  
68 temperate habitats and in alpine environments. The Himalaya, the longest mountain range in  
69 the world, is home of a high bumble bee diversity due to its variety of suitable habitats. The  
70 mountain range spreads over 3,000 km between the Karakorum in the west and the Patkai and  
71 Hengduan mountain ranges in the east. As major barrier for the south-eastern monsoon winds,  
72 it plays an important role in shaping the climate of entire South Asia (Zhisheng et al. 2001,  
73 Xu et al. 2009). The Himalaya is very diverse in local climate, e.g. western end shows strong  
74 annual temperature fluctuations and is relatively arid whereas the eastern end is rather stable  
75 in the annual temperatures and receives a high amount of annual rainfall. These climatic  
76 differences account for distinct differences in flora and fauna (Williams et al. 2010, Rawat  
77 2017). The West Himalaya is characterized by temperate broad leaf forests and arid alpine  
78 meadows and pastures at high altitudes with relatively low annual rainfall (Rawat 2017). At  
79 the east end, in contrast, annual precipitation can reach up to 5,000 mm (Dhar and Nandargi  
80 2006) allowing the formation of subtropical broadleaf forests and moist alpine meadows at  
81 higher altitudes (Rawat 2017). Previous studies found that the biodiversity in the East  
82 Himalaya is particularly rich and the region is considered a global biodiversity hotspot (Myers  
83 et al. 2000).

84 So far, bumble bee composition was intensively studied in the West (Williams 1991, Saini et  
85 al. 2015) and Central Himalaya (Williams et al. 2010). The highest diversity is reported for

86 the Central Himalaya, from Nepal and the Indian state of Sikkim (Williams 2004, Williams et  
87 al. 2010, Saini et al. 2015). Many eastern and western species reach their respective  
88 distribution limit in Nepal and the overlap of both faunal regions may contribute to the high  
89 bumble bee diversity in this area (Williams et al. 2010). The eastern end of the Himalayan  
90 mountain range so far received little attention and only a few actual confirmed records are  
91 available (Williams 2004, Saini et al. 2015). The inaccessibility and the climatic conditions  
92 make field work in the East Himalaya challenging (see comments in Saini et al. 2015, Rawat  
93 2017) and has certainly contributed to the lack of bumble bee research. Arunachal Pradesh,  
94 the northernmost and largest of the Indian north-east region (NER) states, comprises the  
95 eastern end of the Himalayan range. Arunachal Pradesh is unique, being densely forested,  
96 sparsely populated and agriculturally only extensively managed and thus barely fragmented in  
97 its landscape (Tripathi et al. 2016). Previous studies also showed an outstanding biodiversity  
98 and high endemism, e.g. in *Rhododendron* species, bamboos, orchids and many other plant  
99 taxa (Bhuyan et al. 2003, Mao 2010, Paul et al. 2010, Rawat 2017) and butterflies (Sondhi  
100 and Kunte 2016).

101

102 In this study, we report the results from the first systematic survey of bumble bees in  
103 Arunachal Pradesh, based on material collected during three major and a few minor field trips  
104 during the years 2015-2017. The survey represents the first phase of a project aiming at (1)  
105 documenting the bumble bee diversity in the East Himalaya to aid global distribution range  
106 assessments, (2) identifying local pollinators of fruits, vegetables and crop, and (3) identifying  
107 functional adaptations that allow bumble bees to thrive in the particularly challenging climate  
108 of the East Himalaya.

109

## 110 **Material & Methods**

### 111 **Study area and locations**

112 Arunachal Pradesh is the largest of the North-East Indian states and bordered by Bhutan in the  
113 west, the People's Republic of China (Autonomous region of Tibet) in the north, Myanmar in  
114 the east and the Indian states of Assam and Nagaland in the south (Fig. 1).

115 Bumble bee specimens were collected during three major field surveys in the years 2015-  
116 2017. The field trips covered the entire flowering season, pre-monsoon (V.-VI. 2016), during  
117 monsoon (VIII.-IX. 2017) and post-monsoon (IX.-X. 2015). Additional specimens were  
118 collected from the entire state during shorter field visits in the years 2016-2017 (Fig. 1). We  
119 covered altitudes between c. 200 m and c. 4,300 m above sea level and habitats ranging from  
120 foothill forests (tropical wet evergreen and semi-evergreen), temperate broadleaf forest,  
121 subalpine forest up to the alpine zone (Fig. 2, Rawat 2017). GPS locations and altitude were  
122 collected using handheld GPS units or cell phones (Garmin Ltd., CH; Apple Inc., CA, USA)  
123 and later verified using Google Earth (Google LLC, CA, USA). Mapping of the occurrence  
124 data was performed using GPS coordinates and SRTM digital elevation data (Jarvis et al.  
125 2008) in R (R Core Team 2008).

126

### 127 **Sample collection**

128 Bumble bees were collected by sweep netting and immediately killed with cyanide or ethyl  
129 acetate. The specimens were then stored in airtight containers with a few layers of tissue and  
130 the addition of a few drops of ethyl acetate to prevent mold during the transport. After the  
131 field sampling, specimens were dry-mounted on standard insect pins for identification. The  
132 collected specimens were deposited in the NCBS Research Collection (National Center for

133 Biological Sciences, Tata Institute of Fundamental Research, Karnataka, Bangalore) for future  
134 reference. A full list of the collecting information of the museum specimens is available upon  
135 request (curators: Dr. Axel Brockmann and Dr. Krushnamegh Kunte, NCBS Bangalore). In  
136 addition to the collected specimens, we also included some field observations. Since these  
137 specimens are not available for later reference, we only included specimens that could be  
138 unambiguously identified, and from locations where we also collected voucher specimens of  
139 the same species. In addition to the specimens collected in this project, we also checked  
140 entomological collections for bumble bees from Arunachal Pradesh.

141

#### 142 **Experimental ethics**

143 Permits to sample bumble bees were issued by the Government of Arunachal Pradesh to  
144 Jharna Chakravorty (No. SFRI/APBB/9/2011-846, No. SFRI/APBB/09/2016/1168) and to  
145 Himender Bharti (No. CWL/G/13 (95)/2011-12/Pt./2471-75).

146

#### 147 **Species identification**

148 Specimens were identified using published identification keys for adjacent regions, e.g.  
149 Kashmir (Williams 1991), Nepal (Williams et al. 2010), Sichuan (Williams et al. 2009), North  
150 China (An et al. 2014) and India (Saini et al. 2015). In addition, species' first descriptions and  
151 detailed accounts were consulted (Frison 1933, 1935, Tkalcu 1968a, 1974).

152

## 153 **Results**

154 Between 2015 and 2017, 773 bumble bee specimens were either collected, identified in the  
155 field and from photographs or identified in entomological collections (Fig. 1, Tab. 1). 642  
156 specimens were deposited in the NCBS Research Collection. The remaining voucher  
157 specimens are part of research project voucher collections (coll. Jaya Narah, Department of  
158 Zoology, Rajiv Gandhi University, Itanagar, Arunachal Pradesh) or entomological collections  
159 (Department of Entomology, University of Agricultural Sciences, GKVK, Bangalore, India -  
160 15 specimens; NBCS Research Collection, Bangalore, India - 2 specimens).

161

162 The region sampled covers most of the state Arunachal Pradesh, with less dense sampling in  
163 the eastern-most region (Fig. 1). Bumble bees were collected in a large altitudinal range from  
164 233 m to 4,260 m above sea level, covering many different habitat types (Fig. 2). There was a  
165 clear altitudinal change in species composition (Fig. 3). In the moist evergreen forest at low  
166 altitudes (233-1,085 m), only three species from three different subgenera were observed (*B.*  
167 *haemorrhoidalis* SMITH, *B. albopleuralis* FRIESE, *B. breviceps* SMITH; Tab. 1, Fig. 3, Suppl.  
168 Fig. 1B,C,N). Species diversity increased with altitude, climaxing in the region 3,000-4,000 m  
169 (mostly corresponding to the subalpine stage) with 15 species from five subgenera (Fig. 3). In  
170 total, the specimens belong to 21 currently recognized species from six subgenera (Tab. 1).

171

## 172 **Discussion**

### 173 **Bumble bee diversity and species records in the East Himalaya**

174 During several field trips in the Indian state of Arunachal Pradesh, we collected > 700 bumble  
175 bee specimens belonging to 21 species. This survey represents the first systematic study of  
176 bumble bee diversity in the East Himalayan range, which is known as biodiversity hotspot and  
177 an important conservation priority region (Myers et al. 2000).

178

179 Previously, only very few confirmed records of *Bombus* existed for Arunachal Pradesh.  
180 Williams (2004) lists 8 species and predicted the occurrence of another 13 based on their  
181 known distribution. During their 12 year survey of India, and based on a total of almost 7,000  
182 specimens, Saini *et al.* (2015) only recorded one species (*B. eximius* SMITH) from this state.  
183 In our study, we collected individuals of 21 currently recognized species (Tab.1), including  
184 almost all of the previously confirmed (except for *B. turneri* (RICHARDS)) and more than half  
185 of the predicted species (Williams 2004). Furthermore, we collected a number of species that  
186 were previously assumed to either have a West (e.g. *B. miniatus* BINGHAM, *B. novus* (FRISON),  
187 *B. parthenius* RICHARDS) or Central Himalayan distribution (*B. abnormis* (TKALCU), *B. mirus*  
188 (TKALCU), *B. pressus* (FRISON)), and were not expected to occur in Arunachal Pradesh  
189 (Williams 2004). Many of these species were previously classified as “vulnerable”, “near  
190 threatened” (Williams and Osborne 2009) or “extremely rare” (Saini *et al.* 2015), are known  
191 from a limited number of specimens in entomological collections (P. H. Williams, pers.  
192 comment), and could not be found in recent field surveys across India (Saini *et al.* 2015).  
193 *Bombus mirus*, a species previously considered very confined and rare (Tkalcu 1968a,  
194 Williams *et al.* 2010, Saini *et al.* 2015) even represents ~13% of our entire collection (Tab. 1).

195  
196 The present list, comprising 22 species (including *B. turneri*, which was not found in our  
197 survey), places Arunachal Pradesh close to the species diversity found in the West Himalaya,  
198 e.g. Kashmir [29 species], Himachal Pradesh [25] and Uttarakhand [22] (Williams 2004,  
199 Williams *et al.* 2010). Contrary to the East Himalaya, these regions were intensively sampled  
200 in the last decades (Williams 1991, Saini *et al.* 2015). Based on the current sampling status  
201 and the predictions by Williams (2004), we expect more species to be found in the future.  
202 Alpine regions above the tree line (>4,000m) are scarce and not easily accessible in Arunachal  
203 Pradesh (Mishra *et al.* 2006). A more intense survey of these areas will possibly confirm the  
204 presence of high altitude species (e.g. *B. waltoni* COCKERELL, *B. kashmirensis* FRIESE, *B.*  
205 *ladakhensis* RICHARDS, *B. keriensis* MORAWITZ), that are known to occur in South-East Tibet  
206 close to the Indian border (Williams 2004, Williams *et al.* 2015). The East Himalayan region  
207 is still vastly under-sampled and more thorough sampling is needed in the entire NER of India  
208 at the intersection between the Himalaya and the Patkai mountain range and in the mountain  
209 regions of Meghalaya, where the general occurrence of bumble bees is confirmed, but  
210 systematic surveys lack (Frison 1933, Tkalcu 1974, 1989, Williams 2004, Saini *et al.* 2015).  
211 Future work in the region will also provide material for taxonomic revisions. Resulting from  
212 the large number of specific, subspecific and infrasubspecific synonyms, a genus wide  
213 revision is still under progress (Williams 1998). The treatment by Saini *et al.* (2015) not yet  
214 incorporates recent taxonomic changes from sub-generic revisions (e.g. Williams *et al.* 2011,  
215 2012). While the identity of many species in our study is clear from the morphology, a few  
216 nominal taxa are currently treated as species complex and future work will likely change their  
217 taxonomic treatment (e.g. *B. hypnorum* s.l. (LINNAEUS); see Tkalcu 1974, Williams *et al.*  
218 2010).

### 219 **Mimetic circles**

221 Particularly high local convergence in color patterns is often found within the genus *Bombus*.  
222 It is usually interpreted as Müllerian mimicry (Richards 1929, Williams 2007). One of the  
223 most remarkable mimetic circles is found in the Himalaya and South-East Asia, comprising  
224 *B. (Orientalibombus) haemorrhoidalis*, *B. (Alpigenobombus) breviceps*, *B. (Pyrobombus)*  
225 *rotundiceps* FRIESE and the closely related species of the *B. (Megabombus) trifasciatus*-group  
226 (Hines & Williams, 2012; Tkalcu, 1968b; Williams, 1991). The species are members of four



227 different subgenera, corroborating the interpretation that convergent evolution, rather than  
228 common ancestry, is responsible for the color pattern similarity.  
229 Three of these species were found in our study area and show identical color pattern across  
230 Arunachal Pradesh. Two other mimetic groups are present in the region, each comprising  
231 members of at least two different subgenera . First, *B. (Pyrobombus) abnormis*, *B.*  
232 *(Pyrobombus) hypnorum* s.l. and workers of *B. (Melanobombus) festivus* SMITH all have a  
233 brown thorax and a white tail. The second circle comprises *B. (Pyrobombus) flavescens*  
234 SMITH, *B. (Melanobombus) eximius* and *B. (Alpigenobombus) genalis*, which are characterized  
235 by black body pile, orange tinted wings and orange-brown cuticle and hairs on the legs (see  
236 examples in Fig. 4). Color pattern convergence within *Bombus* is also often observed between  
237 the parasitic species of the subgenus *Psithyrus* and their preferred host species (Reinig 1935,  
238 Williams 2008). The parasitic *B. novus* (FRISON), recorded in our study, was previously  
239 assumed to develop in nests of *B. rufofasciatus* SMITH (Tkalcu 1974). Although the female of  
240 *B. novus* shares with *B. rufofasciatus* a reddish band of pile just anterior to the white tail, it  
241 more closely resembles *B. miniatus* in the pale yellow (rather than white-grey) coloration of  
242 the anterior pale bands and the darker tint of the wings (Williams et al. 2010; Suppl. Fig 2).  
243 Furthermore, the known distribution ranges of the latter match more closely, being (mostly)  
244 West Himalayan species that both reach their eastern distribution limit in Arunachal Pradesh,  
245 whereas *B. rufofasciatus* is a widespread Himalayan and Tibetan species (Williams et al.,  
246 2015). However, most *Psithyrus* are to some extent flexible in their host choice and more  
247 observations, especially from breeding *Psithyrus* in their host nests, are necessary to confirm  
248 this suggested parasite-host association (Williams, 2008).

249

#### 250 **Altitudinal distribution and adaptation**

251 Covering a large range of altitudes and habitat types, we found clear patterns of species-  
252 specific altitude ranges (Fig. 3). A number of species are only found in the subalpine and  
253 alpine region at the highest elevations, and they occupy similar altitude niches as in other  
254 regions of the world (e.g. *B. abnormis*, *B. lemniscatus* SKORIKOV, *B. mirus*, *B. nobilis* FRIESE,  
255 *B. pressus* (FRISON); Williams et al. 2009, 2010). We observed the highest species diversity at  
256 altitudes between 3,000-4,000 m (Fig. 3), similar to observation in the Central Himalaya  
257 (Williams et al. 2010). However, at the current stage, this may also represent a sampling bias  
258 from the relatively lower number of sampling points at high altitudes. In general, species  
259 diversity was found to decline towards lower elevations and in the lowland (<1,000 m) only  
260 three species (*B. haemorrhoidalis*, *B. albopleuralis*, *B. breviceps*) were found. These species  
261 also occur at relatively low elevations throughout the Himalaya (lowest elevations: *B.*  
262 *haemorrhoidalis*: Kashmir - 1,000 m, Nepal - 850 m, *B. albopleuralis*: Kashmir - 1,000 m,  
263 Nepal - 950 m, *B. breviceps*: Nepal - 980 m; Williams 1991, Williams et al. 2010). Our  
264 records (*B. haemorrhoidalis* - 398 m, *B. albopleuralis* - 233 m, *B. breviceps* - 484 m; see Tab.  
265 1), represent the lowest elevations at which these species, and bumble bees in general, have  
266 ever been recorded in the Himalayan range (Williams 1991, Williams et al. 2010). Bumble  
267 bees often occur in a wide altitudinal range, but only few species reach the tropical lowland,  
268 where conditions are usually unfavorable for these cold-adapted bees (Moure and Sakagami  
269 1962, Williams 1991, Gonzalez et al. 2004, Williams et al. 2009).

270 Our observation may have multiple, not mutually exclusive, explanations. First, the specific  
271 climate of the East Himalaya probably allows certain bumble bee species to thrive at  
272 relatively lower altitudes (see below). Indeed, there seems to be a gradual decrease in the  
273 lower elevation limit from the west to the east that supports this interpretation (Williams  
274 1991, Williams et al. 2010). Second, bumble bee workers can cover large horizontal and,

275 particularly in steep terrain, vertical distances during their foraging trips (Osborne et al.  
276 1999). In Arunachal Pradesh, most of the valleys are particularly steep and both lowland and  
277 higher elevations are within the foraging distance of a few kilometers. Therefore, the low  
278 records may represent foraging workers from a nest at higher altitude.

279  
280 *B. haemorrhoidalis*, *B. albopleuralis* and *B. breviceps* cover a wide range of altitudes and  
281 usually were most abundant at medium elevations (Tab. 1, Suppl. Fig. 1). Nevertheless, the  
282 wide range of foraging habitats, each posing their own challenges with respect to  
283 thermoregulation and energy expenditure, is remarkable. Future work is necessary to assess  
284 their specific individual and population-level adaptations that provide the plasticity to cover  
285 such a diversity in altitudes and habitat types, while other species are restricted to very small  
286 ranges and specific habitats (Williams et al. 2009, 2010, 2018). This plasticity (or absence of)  
287 is of particular interest when we want to understand potential threats due to climate change,  
288 making some species more vulnerable than others.

289  
290 Several physiological and behavioral adaptations have been discussed in the context of  
291 altitudinal adaptation in bumble bees and previous work shows that behavioral plasticity  
292 allows quick adaptation to different altitudes (Dillon et al. 2006, Dillon and Dudley 2014). At  
293 the morphological and physiological level, wing load and wing aspect ratio (Cartar 1992),  
294 variation of the cuticular hydrocarbon composition, which prevents bees from desiccation  
295 (Foley and Telonis-Scott 2010, Menzel et al. 2017), or changes in mitochondrial density  
296 and/or enzyme composition (Harrison et al. 2006, Zhang et al. 2013) may be important factors  
297 that vary among populations. However, the specific adaptations that allow these species to  
298 thrive in the particularly challenging habitats in the East Himalaya, where the peak of the  
299 monsoon season coincides with the peak of colony development in many species, is subject to  
300 future investigations. Our survey identified *B. haemorrhoidalis* and *B. albopleuralis* as  
301 suitable model taxa to investigate the potential adaptations to specific climatic conditions at  
302 the individual and population level. Both species cover a wide range of altitudes and are  
303 widely distributed in Arunachal Pradesh (Tab. 1. Suppl. Fig. 1).

304

### 305 **Current and Future Threats and Conservation**

306 The finding of many rare and confined species of bumble bees in Arunachal Pradesh  
307 highlights the importance of extensive sampling in remote regions to better understand  
308 species distribution and ecological requirements (see also the discussion in Williams 2018).

309

310 Although many species may be confined or rare from a global perspective, they can be locally  
311 abundant and/or restricted to a very specific habitat. The specific climate of the East  
312 Himalaya, with the high amount of precipitation, supports a high biodiversity including a  
313 large amount of endemism in the region (Myers et al. 2000, Mao 2010). Our observations  
314 suggest that a couple of bumble bee species may be particularly adapted to these conditions as  
315 they are restricted to a very limited region in the East Himalaya (e.g. *B. mirus*, *B. genalis*).

316

317 Arunachal Pradesh can currently be considered a remote region without serious recent land  
318 use changes, only small scale agriculture and a very low population density (Sikri 2006).  
319 However, locally distributed species and high altitude specialists may still be under future  
320 threat of extinction, through changes in agricultural practices or climate change (Xu et al.  
321 2009, Hoiss et al. 2012). Rising temperatures force bumble bee species to shift to higher  
322 elevations (Kerr et al. 2015), but high elevation refuges may be limited for species that are

323 adapted to the East Himalayan climate. It is therefore crucial to understand the adaptations of  
324 the local bumble bee fauna to assess their future threat status. Furthermore it is crucial to  
325 develop general strategies for the future to preserve much of this remarkable region (Myers et  
326 al. 2000, Anonymous 2011).

327  
328 In the Himalaya, bumble bees serve as important pollinators of many fruits and vegetables,  
329 e.g. cardamom (Deka et al. 2011), apple and other fruit (Raj et al. 2012, Raj and Mattu 2014)  
330 and crop (Tayeng and Gogoi 2018). Understanding their ecological requirements and  
331 preserving the habitats to support pollinator diversity is crucial for a sufficient agricultural  
332 yield, especially in the extensively managed small-holder farming systems that are abundant  
333 in Arunachal Pradesh (Kala 2005). Bumble bees are used worldwide as pollinators for  
334 commercial fruit and vegetable production (Velthuis and van Doorn 2006). Initially,  
335 commercially reared species were used outside their native range, resulting both in the  
336 introduction of alien species (Morales et al. 2013) and pathogen spread to native bumble bee  
337 populations (Arbetman et al. 2013). Nowadays, attempts are made to select suitable native  
338 species and develop methods for their commercial rearing in many world regions (Padilla et  
339 al. 2017). Laboratory rearing of *B. haemorrhoidalis* in India (Chauhan et al. 2014) and *B.*  
340 *breviceps* in Vietnam (Thai and Van Toan 2018) are first steps to produce native bumble bee  
341 colonies for commercial pollination. Both species are widespread in Arunachal Pradesh and  
342 would make good pollinators for many fruit and vegetables (Deka et al. 2011). Additional  
343 work is now necessary to either confirm its potential or find other promising species for the  
344 future development of commercial fruit and crop pollination in Arunachal Pradesh.

345

## 346 Acknowledgements

347 We are particularly grateful to the students that helped during the field collections (Rajiv  
348 Gandhi University: Mosses Messar, Mohin Raza Naqvi, Nyaton Kitnya; Punjabi University:  
349 Joginder Singh, Sishal Sasi; University of Würzburg: Franziska Bandorf) to Tapir Darang,  
350 and the drivers and carriers who made the field trips possible.

351 We further thank the curators of the NCBS Research Collection (Dr. K. Kunte) and the  
352 Collection of the Entomology Department of the University of Agricultural Sciences, GKVK,  
353 Bangalore (Prof. V. Belavadi) for access and support during our visits to the collections and  
354 the permit to use their data for our distribution records. P.H. Williams (National History  
355 Museum, London, UK) provided much valuable information and kindly identified a few  
356 voucher specimens.

357 The bumble bee mapping project is part of the Chemical Ecology Network Programme  
358 funded by the Department of Biotechnology, Govt of India (Sanction number-No. DBT-  
359 NER/Agri/24/2013). The Field trips of researchers from RGU and NCBS were supported by  
360 funds from Chemical Ecology Project. Researchers from the University of Würzburg and  
361 Vienna were supported by institutional funds from the University of Würzburg to Thomas  
362 Schmitt and Johannes Spaethe.



363 **References**

- 364 **An, J., J. Huang, Y. Shao, S. Zhang, B. Wang, X. Liu, J. Wu, and P. H. Williams. 2014.**  
365 The bumblebees of North China (Apidae, *Bombus* Latreille). *Zootaxa*. 3830: 1–89.
- 366 **Anonymous. 2011.** Arunachal Pradesh state action plan on climate change. Government of  
367 Arunachal Pradesh.
- 368 **Arbetman, M. P., I. Meeus, C. L. Morales, M. A. Aizen, and G. Smagghe. 2013.** Alien  
369 parasite hitchhikes to Patagonia on invasive bumblebee. *Biol. Invasions*. 15: 489–494.
- 370 **Bhuyan, P., M. L. Khan, and R. S. Tripathi. 2003.** Tree diversity and population structure  
371 in undisturbed and human-impacted stands of tropical wet evergreen forest in Arunachal  
372 Pradesh, Eastern Himalayas, India. *Biodivers. Conserv.* 12: 1753–1773.
- 373 **Cameron, S. A., J. D. Lozier, J. P. Strange, J. B. Koch, N. Cordes, L. F. Solter, and T. L.**  
374 **Griswold. 2011.** Patterns of widespread decline in North American bumble bees. *Proc.*  
375 *Natl. Acad. Sci.* 108: 662–667.
- 376 **Cartar, R. V. 1992.** Morphological senescence and longevity: An experiment relating wing  
377 wear and life span in foraging wild bumble bees. *J. Anim. Ecol.* 61: 225.
- 378 **Chauhan, A., B. S. Rana, and S. Katna. 2014.** Successful rearing of bumble bee, *Bombus*  
379 *haemorrhoidalis* Smith year round in Himachal Pradesh in India. *Int. J. Curr. Res.* 6:  
380 10891–10896.
- 381 **Corbet, S. A., M. Fussell, R. Ake, A. Fraser, C. Gunson, A. Savage, and K. Smith. 1993.**  
382 Temperature and the pollinating activity of social bees. *Ecol. Entomol.* 18: 17–30.
- 383 **Deka, T. N., M. R. Sudharshan, and K. A. Saju. 2011.** New record of bumble bee, *Bombus*  
384 *breviceps* Smith as a pollinator of large cardamom. *Curr. Sci.* 100: 926–928.
- 385 **Dhar, O. N., and S. Nandargi. 2006.** Rainfall distribution over the Arunachal Pradesh  
386 Himalayas. *Weather.* 59: 155–157.
- 387 **Dillon, M. E., and R. Dudley. 2014.** Surpassing Mt. Everest: extreme flight performance of  
388 alpine bumble-bees. *Biol. Lett.* 10: 20130922.
- 389 **Dillon, M. E., M. R. Frazier, and R. Dudley. 2006.** Into thin air: Physiology and evolution  
390 of alpine insects. *Integr. Comp. Biol.* 46: 49–61.
- 391 **Foley, B., and M. Telonis-Scott. 2010.** Quantitative genetic analysis suggests causal  
392 association between cuticular hydrocarbon composition and desiccation survival in  
393 *Drosophila melanogaster*. *Heredity.* 106: 68–77.
- 394 **Frison, T. H. 1933.** Records and descriptions of *Bremus* and *Psithyrus* from India (Bremidae:  
395 Hymenoptera). *Rec. Indian Museum.* 35: 331–342.
- 396 **Frison, T. H. 1935.** Records, notes and descriptions of *Bremus* from Asia (Bremidae:  
397 Hymenoptera). *Rec. Indian Museum.* 37: 339–363.
- 398 **Gonzalez, V. H., A. Mejia, and C. Rasmussen. 2004.** Ecology and nesting behavior of  
399 *Bombus atratus* Franklin in Andean highlands (Hymenoptera: Apidae). *J. Hymenopt.*  
400 *Res.* 13: 28–36.
- 401 **Harrison, J., M. R. Frazier, J. R. Henry, A. Kaiser, C. J. Klok, and B. Rascón. 2006.**  
402 Responses of terrestrial insects to hypoxia or hyperoxia. *Respir. Physiol. Neurobiol.* 154:  
403 4–17.
- 404 **Hines, H. M., and P. H. Williams. 2012.** Mimetic colour pattern evolution in the highly

- 405 polymorphic *Bombus trifasciatus* (Hymenoptera: Apidae) species complex and its  
406 comimics. *Zool. J. Linn. Soc.* 166: 805–826.
- 407 **Hoiss, B., J. Krauss, S. G. Potts, S. Roberts, and I. Steffan-Dewenter. 2012.** Altitude acts  
408 as an environmental filter on phylogenetic composition, traits and diversity in bee  
409 communities. *Proc. R. Soc. B Biol. Sci.* 279: 4447–4456.
- 410 **Jacobson, M. M., E. M. Tucker, M. E. Mathiasson, and S. M. Rehan. 2018.** Decline of  
411 bumble bees in northeastern North America, with special focus on *Bombus terricola*.  
412 *Biol. Conserv.* 217: 437–445.
- 413 **Jarvis, A., H. I. Reuter, A. Nelson, and E. Guevara. 2008.** Hole-filled seamless SRTM data  
414 V4, International Centre for Tropical Agriculture (CIAT). (<http://srtm.csi.cgiar.org>).
- 415 **Kala, C. P. P. 2005.** Ethnomedicinal botany of the Apatani in the Eastern Himalayan region  
416 of India. *J. Ethnobiol. Ethnomed.* 1: 1–8.
- 417 **Kerr, J. T., A. Pindar, P. Galpern, L. Packer, S. G. Potts, S. M. Roberts, P. Rasmont, O.  
418 Schweiger, S. R. Colla, L. L. Richardson, D. L. Wagner, L. F. Gall, D. S. Sikes, and  
419 A. Pantotoja. 2015.** Climate change impacts on bumblebees across continents. *Science*  
420 (80-. ). 349: 177–180.
- 421 **Kevan, P. G., and H. G. Baker. 1983.** Insects as flower visitors and pollinators. *Annu. Rev.*  
422 *Entomol.* 28: 407–453.
- 423 **Mao, A. A. 2010.** The genus *Rhododendron* in north-east India. *Plant Sci.* 7: 26–34.
- 424 **Menzel, F., B. B. Blaimer, and T. Schmitt. 2017.** How do cuticular hydrocarbons evolve?  
425 Physiological constraints and climatic and biotic selection pressures act on a complex  
426 functional trait. *Proc. R. Soc. B Biol. Sci.* 284.
- 427 **Mishra, C., M. D. Madhusudan, and A. Datta. 2006.** Mammals of the high altitudes of  
428 western Arunachal Pradesh, eastern Himalaya: an assessment of threats and conservation  
429 needs. *Oryx.* 40: 29–35.
- 430 **Morales, C. L., M. P. Arbetman, S. A. Cameron, and M. A. Aizen. 2013.** Rapid ecological  
431 replacement of a native bumble bee by invasive species. *Front. Ecol. Environ.* 11: 529–  
432 534.
- 433 **Moure, J. S., and S. F. Sakagami. 1962.** As mamangabas sociais do Brasil (*Bombus*  
434 Latr.)(Hym., Apoidea). *Stud. Entomol.* 5: 65–194.
- 435 **Myers, N., G. A. B. Fonseca, R. A. Mittermeier, G. A. B. Fonseca, and J. Kent. 2000.**  
436 Biodiversity hotspots for conservation priorities. *Nature.* 403: 853–858.
- 437 **Osborne, A. J. L., S. J. Clark, R. J. Morris, I. H. Williams, J. R. Riley, A. D. Smith, R.  
438 Reynolds, and a S. Edwards. 1999.** A landscape-scale study of bumble bee foraging  
439 range and constancy using harmonic radar. *J. Appl. Ecol.* 36: 519–533.
- 440 **Padilla, S. C., J. R. Cure, D. A. Riaño, A. P. Gutierrez, D. Rodriguez, and E. Romero.  
441 2017.** Gyne and drone production in *Bombus atratus* (Hymenoptera: Apidae). *J. Apic.*  
442 *Sci.* 61.
- 443 **Paul, A., M. L. Khan, A. K. Das, and P. K. Dutta. 2010.** Diversity and distribution of  
444 *Rhododendrons* in Arunachal Himalaya, India. *J. Am. Rhododendron Soc.* 3: 200–205.
- 445 **Raj, H., and V. K. Mattu. 2014.** Diversity and distribution of insect pollinators on various  
446 temperate fruit crops in Himachal Himalaya, India. *Int. J. Sci. Nat.* 5: 626–631.

- 447 **Raj, H., V. K. Mattu, and M. L. Thakur. 2012.** Pollinator diversity and relative abundance  
448 of insect visitors on apple crop in Shimla Hills of Western Himalaya, India. *Int. J. Sci.*  
449 *Nat.* 3: 507–513.
- 450 **Rasmont, P., M. Franzén, T. Lecocq, A. Harpke, P. M. Roberts Stuart, J. Biesmeijer, L.**  
451 **Castro, B. Cederberg, L. Dvorák, Ú. Fitzpatrick, Y. Gonseth, E. Haubruge, G.**  
452 **Mahé, A. Manino, D. Michez, J. Neumayer, F. Ødegaard, J. Paukkunen, T.**  
453 **Pawlikowski, G. Potts Simon, M. Reemer, J. Settele, J. Straka, and O. Schweiger.**  
454 **2015.** Climatic risk and distribution atlas of European bumblebees. *BioRisk*. 10: 1–236.
- 455 **Rawat, G. S. 2017.** The Himalayan vegetation along horizontal and vertical gradients, pp.  
456 189–204. *In* Prins, H.T., Namgail, T. (eds.), *Bird Migration in the Himalaya*. Cambridge  
457 University Press.
- 458 **Reinig, W. F. 1935.** On the variation of *Bombus lapidarius* L. and its cuckoo, *Psithyrus*  
459 *rupestris* Fabr., with notes on mimetic similarity. *J. Genet.* 30: 321–356.
- 460 **Richards, O. W. 1929.** Parallel colour variations in humble bees from the Himalayas. *Proc.*  
461 *R. Entomol. Soc. London.* 3: 75–76.
- 462 **Saini, M. S., R. H. Raina, and H. S. Ghatot. 2015.** Indian Bumblebees. Bishen Singh  
463 Mahendra Pal Singh, Dehra Dun, India.
- 464 **Sikri, D. K. 2006.** Census of India 2001 - Arunachal Pradesh Administrative Atlas. Controller  
465 of Publications, Delhi, Delhi.
- 466 **Sondhi, S., and K. Kunte. 2016.** Butterflies of the Kameng protected area complex, Western  
467 Arunachal Pradesh. *J. Threat. Taxa.* 8: 9053–9124.
- 468 **Tayeng, M., and H. Gogoi. 2018.** Insect pollinators of crops and fruits in Arunachal Pradesh,  
469 Eastern Himalaya: Rich diversity in flowers with yellow anther. *Proc. Zool. Soc.* 71: 56–  
470 62.
- 471 **Team, R. D. C. 2008.** R: A language and environment for statistical computing. Vienna,  
472 Austria.
- 473 **Thai, P. H., and T. Van Toan. 2018.** Beekeeping in Vietnam, pp. 247–267. *In*  
474 Chantawannakul, P., Williams, G., Neumann, P. (eds.), *Asian Beekeeping in the 21<sup>st</sup>*  
475 *Century*. Springer Singapore, Singapore.
- 476 **Tkalcu, B. 1968a.** Neue Arten der Unterfamilie Bombinae der paläarktischen Region  
477 (Hymenoptera, Apoidea). *Acta Entomol. Bohemoslov.* 65: 21–51.
- 478 **Tkalcu, B. 1968b.** Revision der vier sympatrischen, homochrome geographische Rassen  
479 bildenden Hummelarten SO-Asien (Hymenoptera, Apoidea, Bombinae). *Annot. Zool.*  
480 *Bot.* 52: 1–31.
- 481 **Tkalcu, B. 1974.** Eine Hummel-Ausbeute aus dem Nepal-Himalaya (Insecta, Hymenoptera,  
482 Apoidea, Bombinae). *Senckenb. Biol.* 55: 311–349.
- 483 **Tkalcu, B. 1989.** Neue Taxa asiatischer Hummeln (Hymenoptera, Apoidea). *Acta Entomol.*  
484 *Bohemoslov.* 86: 39–60.
- 485 **Tripathi, R. S., A. Roy, D. Kushwaha, F. Lalnunmawia, Lalnundanga, C.**  
486 **Lalraminghlova, H. Lalnunzira, and P. S. Roy. 2016.** Perspectives of forest  
487 biodiversity conservation in Northeast India. *J. Biodiversity, Bioprospecting Dev.* 3: 1–9.
- 488 **Velthuis, H. H. W. W., and A. van Doorn. 2006.** A century of advances in bumblebee  
489 domestication and the economic and environmental aspects of its commercialization for

- 490           pollination. *Apidologie*. 37: 421–451.
- 491 **Williams, P. H. 1991.** The bumblebees of the Kashmir Himalaya (Hymenoptera: Apidae,  
492           Bombini). *Bull. Br. Museum*. 60: 1–204.
- 493 **Williams, P. H. 1998.** An annotated checklist of bumble bees with an analysis of patterns of  
494           descriptopn (Hymenoptera: Apidade, Bombini). *Bull. Nat. Hist. Museum*. 67: 79–152.
- 495 **Williams, P. H. 2004.** Genus *Bombus* Latreille. In Gupta, R.K. (ed.), *An Annotated Checklist*  
496           of the Bee Species of the Indian Region. Jai Narain Vyas University, Jodhpur.
- 497 **Williams, P. H. 2007.** The distribution of bumblebee color patterns worldwide: possible  
498           significance for thermoregulation, crypsis, and warning mimicry. *Biol. J. Linn. Soc.* 92:  
499           97–118.
- 500 **Williams, P. H. 2008.** Do the parasitic *Psithyrus* resemble their host bumblebees in colour  
501           pattern? *Apidologie*. 39: 637–649.
- 502 **Williams, P. H. 2018.** In a group of its own? Rediscovery of one of the world’s rarest and  
503           highest mountain bumblebees, *Bombus tanguticus*. *J. Nat. Hist.* 52: 305–321.
- 504 **Williams, P. H., J. An, and J. Huang. 2011.** The bumblebees of the subgenus  
505           *Subterraneobombus*: Integrating evidence from morphology and DNA barcodes  
506           (Hymenoptera, Apidae, *Bombus*). *Zool. J. Linn. Soc.* 163: 813–862.
- 507 **Williams, P. H., M. J. F. Brown, J. C. Carolan, J. An, D. Goulson, A. M. Aytakin, L. R.**  
508           **Best, A. M. Byvaltsev, B. Cederberg, R. Dawson, J. Huang, M. Ito, A. Monfared, R.**  
509           **H. Raina, P. Schmid-Hempel, C. S. Sheffield, P. Šima, and Z. Xie. 2012.** Unveiling  
510           cryptic species of the bumblebee subgenus *Bombus* s. str. worldwide with COI barcodes  
511           (Hymenoptera: Apidae). *Syst. Biodivers.* 10: 21–56.
- 512 **Williams, P. H., N. Bystriakova, J. Huang, Z. Miao, and J. An. 2015.** Bumblebees, climate  
513           and glaciers across the Tibetan plateau (Apidae: *Bombus* Latreille). *Syst. Biodivers.* 13:  
514           164–181.
- 515 **Williams, P. H., S. Cameron, H. M. Hines, B. Cederberg, and P. Rasmont. 2008.** A  
516           simplified subgeneric classification of the bumblebees (genus *Bombus*). *Apidologie*. 39:  
517           1–29.
- 518 **Williams, P. H., M. Ito, T. Matsumura, and I. Kudo. 2010.** The Bumblebees of the Nepal  
519           Himalaya (Hymenoptera: Apidae). *Insecta Matsumurana*. 66: 115–151.
- 520 **Williams, P. H., J. M. Lobo, and A. S. Meseguer. 2018.** Bumblebees take the high road:  
521           climatically integrative biogeography shows that escape from Tibet, not Tibetan uplift, is  
522           associated with divergences of present-day *Mendacibombus*. *Ecography*. 41: 461–477.
- 523 **Williams, P. H., and J. L. Osborne. 2009.** Bumblebee vulnerability and conservation world-  
524           wide. *Apidologie*. 40: 367–387.
- 525 **Williams, P., Y. Tang, J. Yao, and S. Cameron. 2009.** The bumblebees of Sichuan  
526           (Hymenoptera: Apidae, Bombini). *Syst. Biodivers.* 7: 101–189.
- 527 **Xu, J., R. E. Grumbine, A. Shresta, M. Eriksson, X. Yang, Y. Wang, and A. Wilkes.**  
528           **2009.** The melting Himalayas - cascading effects of climate change on water,  
529           biodiversity, and livelihoods. *Conserv. Biol.* 23: 520–530.
- 530 **Yu, W.-B., D.-Z. Li, and H. Wang. 2012.** Highly efficient pollination by bumblebees  
531           ensures seed production in *Pedicularis lachnoglossa* (Orobanchaceae), an early-  
532           flowering Himalayan plant. *J. Syst. Evol.* 50: 218–226.

- 533 **Zhang, Z., B. Chen, D. Zhao, L. Kang, and P. R. S. B. 2013.** Functional modulation of  
534 mitochondrial cytochrome c oxidase underlies adaptation to high-altitude hypoxia in a  
535 Tibetan migratory locust. *Proc. R. Soc. London B Biol. Sci.* 280: 20122758.
- 536 **Zhisheng, A., J. E. Kutzbach, W. L. Prell, and S. C. Porter. 2001.** Evolution of Asian  
537 monsoons and phased uplift of the Himalaya- Tibetan plateau since late miocene times.  
538 *Nature.* 411: 62–66.



539 **Table 1. Summary of the collected bumble bee specimens**

540 Listed are all specimens (N = 773) that have been seen and identified by the authors, including  
 541 material collected during the field trips, specimens from research and museum collections, and  
 542 specimens identified in the field. Subgenera are sorted according to their phylogenetic position  
 543 (Williams et al. 2008). Among the subgenera, species are sorted alphabetically.

544

| <i>subgenus</i>               | <i>species</i>                  | <i>specimen</i> | <i>Q</i> | <i>W</i> | <i>M</i> | <i>altitude range</i> | <i>no. localities</i> |
|-------------------------------|---------------------------------|-----------------|----------|----------|----------|-----------------------|-----------------------|
| <b><i>Orientalibombus</i></b> | <i>B. funerarius</i> SMITH      | 3               | 0        | 2        | 1        | 2,398-3,228           | 2                     |
|                               | <i>B. haemorrhoidalis</i> SMITH | 150             | 13       | 130      | 7        | 398-3,445             | 48 <sup>a</sup>       |
| <b><i>Megabombus</i></b>      | <i>B. albopleuralis</i> FRIESE  | 83              | 5        | 70       | 8        | 233-2,985             | 40 <sup>a</sup>       |
| <b><i>Psithyrus</i></b>       | <i>B. cornutus</i> (FRISON)     | 1               | 0        | -        | 1        | 3,278                 | 1                     |
|                               | <i>B. novus</i> (FRISON)        | 1               | 1        | -        | 0        | 4,198                 | 1                     |
| <b><i>Pyrobombus</i></b>      | <i>B. abnormis</i> (TKALCU)     | 4               | 4        | 0        | 0        | 3,684-3,944           | 2                     |
|                               | <i>B. flavescens</i> SMITH      | 31              | 2        | 22       | 7        | 1,507-3,133           | 8                     |
|                               | <i>B. hypnorum</i> s.l. (L.)    | 9               | 0        | 4        | 5        | 2,850-3,983           | 5                     |
|                               | <i>B. lemniscatus</i> SKORIKOV  | 10              | 6        | 1        | 3        | 3,500-4,260           | 5                     |
|                               | <i>B. luteipes</i> RICHARDS     | 76              | 0        | 70       | 6        | 1,145-3,500           | 21                    |
|                               | <i>B. mirus</i> (TKALCU)        | 98              | 17       | 51       | 30       | 2,850-4,260           | 24                    |
|                               | <i>B. parthenius</i> RICHARDS   | 20              | 0        | 16       | 4        | 2,950-3,684           | 8                     |
|                               | <i>B. pressus</i> (FRISON)      | 41              | 4        | 27       | 10       | 3,505-4,030           | 19                    |
|                               | <i>B. breviceps</i> SMITH)      | 34              | 3        | 28       | 3        | 484-2,790             | 19                    |
| <b><i>Alpigenobombus</i></b>  | <i>B. genalis</i> FRIESE        | 6               | 0        | 6        | 0        | 1561-1,852            | 3                     |
|                               | <i>B. grahami</i> (FRISON)      | 2               | 0        | 2        | 0        | 2,707                 | 1                     |
|                               | <i>B. nobilis</i> FRIESE        | 75              | 4        | 61       | 10       | 3,777-4,260           | 21                    |
| <b><i>Melanobombus</i></b>    | <i>B. eximius</i> SMITH         | 9               | 1        | 8        | 0        | 1,087-1,717           | 6                     |
|                               | <i>B. festivus</i> SMITH        | 63              | 4        | 54       | 5        | 1,940-4,260           | 21                    |
|                               | <i>B. miniatus</i> BINGHAM      | 31              | 1        | 17       | 13       | 2,398-4,240           | 11                    |
|                               | <i>B. rufofasciatus</i> SMITH   | 26              | 11       | 11       | 4        | 2,398-4,260           | 11                    |

Q – number of queens, W – number of workers, M – number of males

<sup>a</sup> includes one specimen with unspecified location or imprecise locality information

545

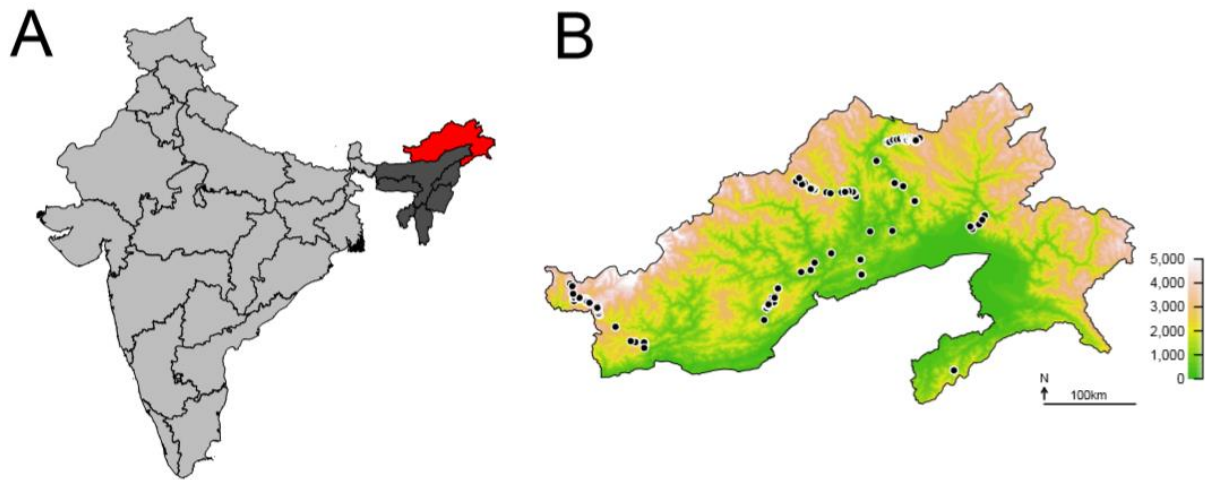

546  
547

**Figure 1. Sampling locations**

548 (A) Mainland India with the geographic location of Arunachal Pradesh (red filled area) in the north-  
549 east region (NER, dark grey area). Outlines denote Indian state borders. (B) Sampling locations within  
550 the state of Arunachal Pradesh for three major and a few minor field trips between 2015 and 2017. The  
551 locations are projected from GPS data to a SRTM elevation data set. The color scale refers to altitude  
552 and does not reflect vegetation zone.

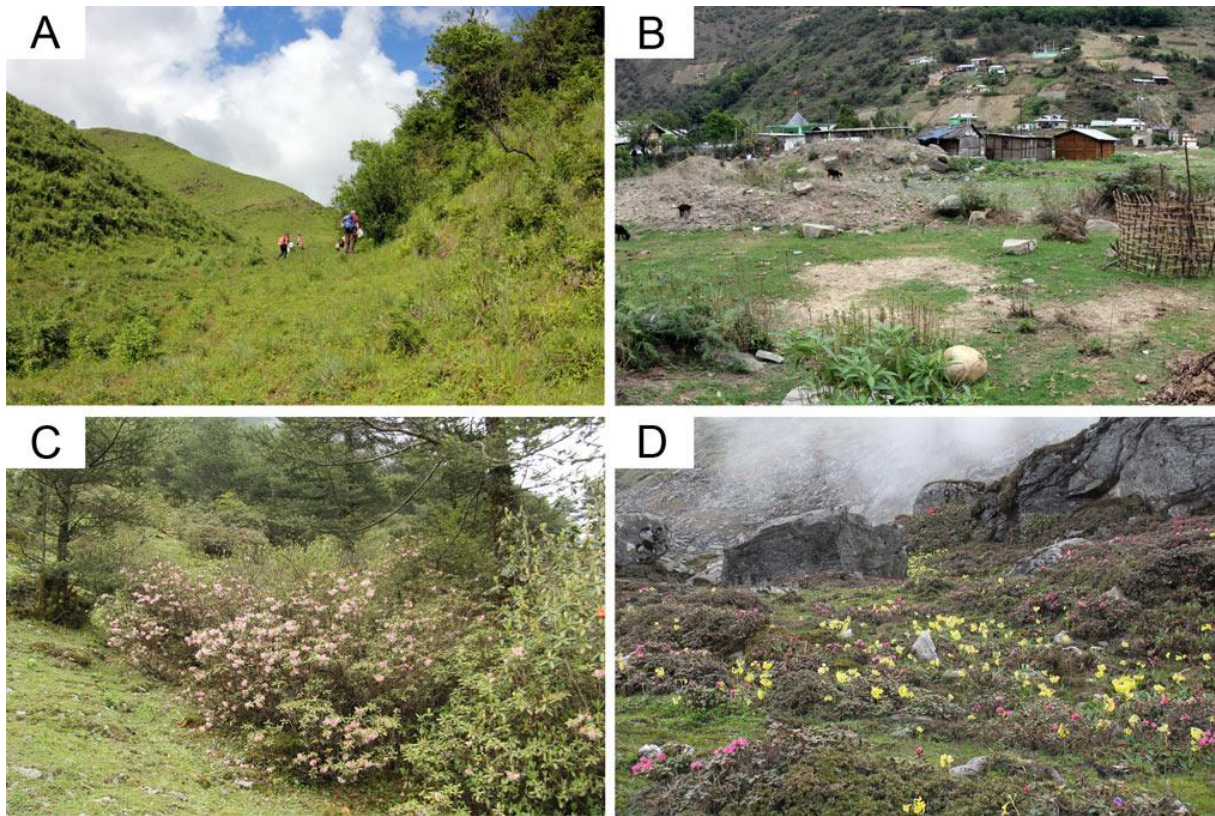

553

554 **Figure 2. Bumble bee habitats in Arunachal Pradesh**

555 (A) Grass-/shrubland at 1,950 - 2,050 m altitude (Mechuka, West Siang district). Workers of *B.*  
556 *festivus* and *B. luteipes* and workers and males of *B. flavescens* were observed visiting *Cotoneaster*  
557 bushes. (B) Agricultural crops located in a river valley at 1,500 m altitude (Old Dirang, West Kameng  
558 district). Workers of *B. flavescens* were collected from *Punica granatum* flowers. (C) Ever-green  
559 deciduous *Rhododendron*- and *Pinus*- forest at 3,500 m (Karpo, Tawang district), where we collected  
560 queens of *B. festivus* and *B. pressus*. (D) Alpine meadow with flowering *Primula sp.* and  
561 *Rhododendron sp.* (Se-La Pass, Tawang district) at 4,260 m, where we collected *B. mirus*, *B.*  
562 *lemniscatus*, *B. nobilis*, *B. festivus*, *B. rufofasciatus*, *B. miniatus* and *B. novus*.

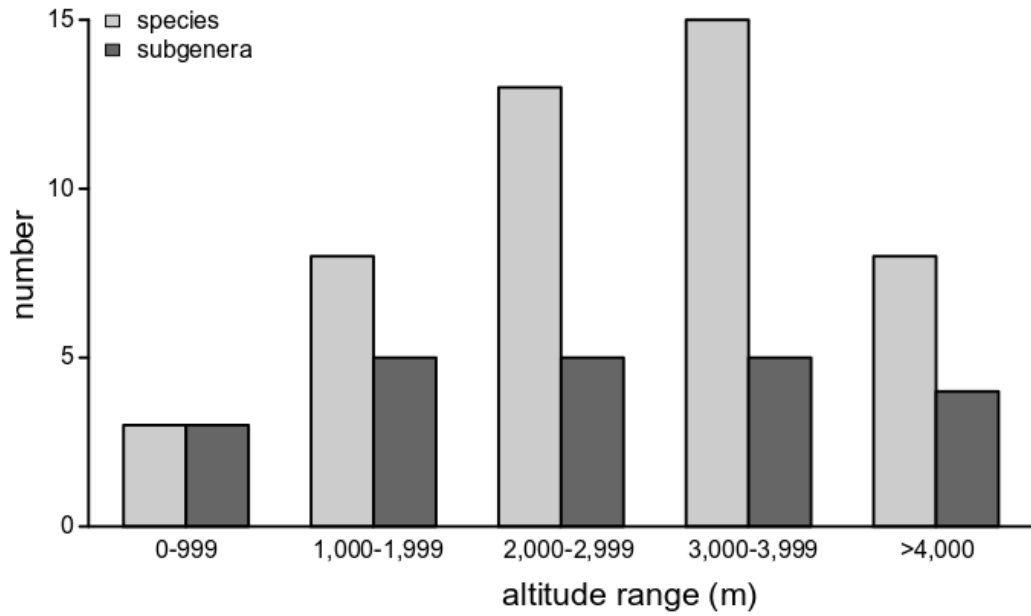

563

564 **Figure 3. Species and subgenera diversity along the altitudinal gradient**

565 In the lowland tropical forest (<1,000m) only *B. haemorrhoidalis*, *B. albopleuralis* and *B. breviceps*  
566 were observed. With increasing altitude we found an increasing diversity of species. The relatively  
567 low diversity at >4,000m may be a sampling bias, since only a few locations were accessible.



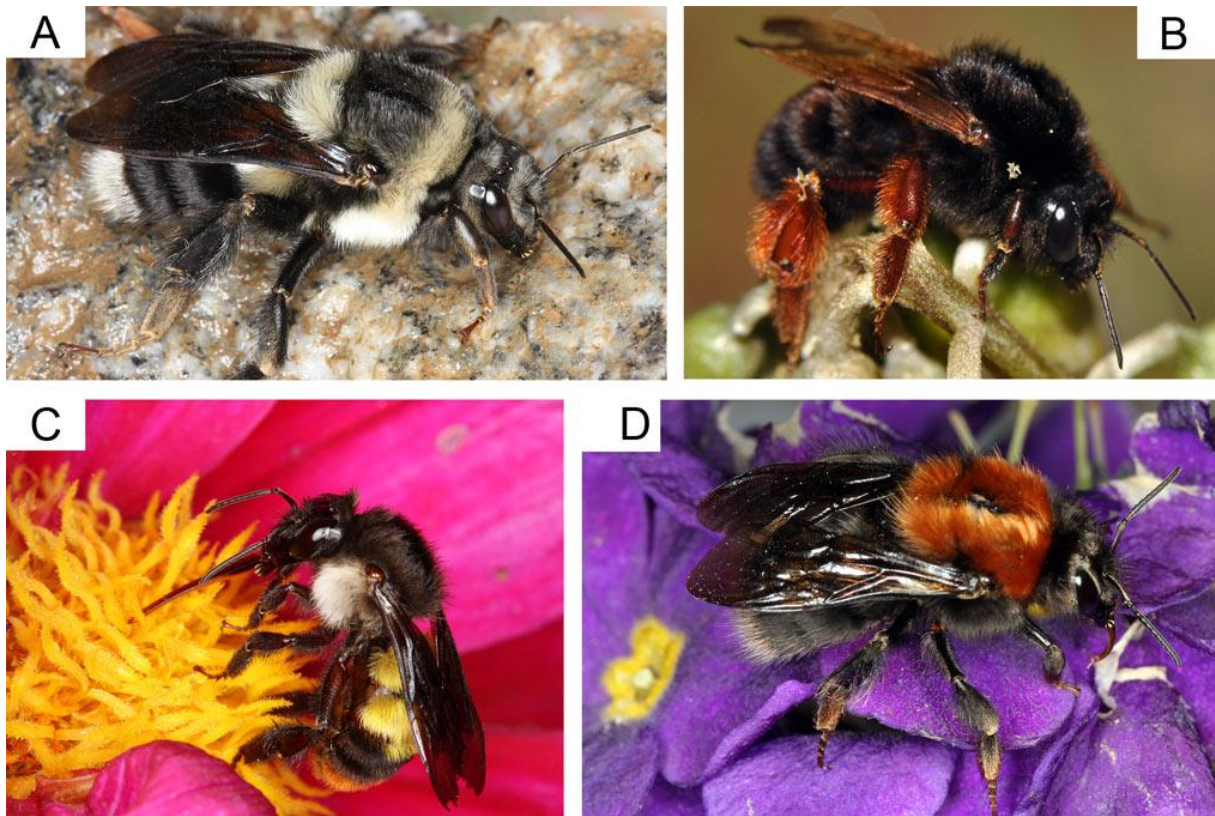

568

569

570

571

572

573

574

575

**Figure 4. Examples of bumble bee specimens collected in Arunachal Pradesh**

(A) *Bombus miniatus* (queen) is a West Himalayan species of the subgenus *Melanobombus* reaching its eastern distribution limit in Arunachal Pradesh. (B) *Bombus genalis* (worker), a rare species of the mid-elevation that is narrowly distributed in the East Himalaya. (C) *Bombus albopleuralis* (worker), a wide-spread Himalayan species that occurs in a large altitudinal range from the tropical lowlands to the subalpine zone in Arunachal Pradesh. (D) *Bombus abnormis* (queen), an elusive and very rare high elevation species of the subgenus *Pyrobombus* that is narrowly distributed in the East Himalaya.
